# Supplementary material
Source: publisher site journal article supplement (https://www.dovepress.com/article/371502)
Supplement: Supplementary file 1 [file get_supplementary_file.php]

Please complete the survey below.

**Thank you for participating in this survey. Your feedback is important.**

**BY PARTICIPATING, YOU WILL BE ENTERED IN A DRAWING FOR A \$100 AMAZON GIFT CARD**

My name is Ravindra Gopaul and I am an Emergency Physician at Penn State Milton S. Hershey Medical Center. I am conducting a research study among ED Providers and Cardiologists pertaining to their use of the HEART Score tool to risk stratify chest pain patients. I kindly ask for your participation in a brief 5 minute survey by clicking on the link below. This is purely for research purposes and no identifying information will be obtained. Please see additional details provided below:

Title of Project: Evaluation of provider assessments of clinical history when using the HEART Score

Principal Investigator: Ravindra Gopaul

Address:

Penn State Milton S. Hershey Medical Center  
500 University Drive  
Hershey, PA 17033

Telephone Numbers: Weekdays: 8:00 a.m. to 5:00 p.m. (717) 531-0003 ext-320531

You are being invited to volunteer to participate in a research study. Research studies include only people who voluntarily choose to take part. This summary explains information about this research.

- The purpose of this study is to evaluate provider assessment of patient history when using the HEART Score tool for risk stratification of chest pain patients.
- You will be administered a survey consisting of clinical vignettes. For each vignette, please indicate how you would score patient history (highly, moderately or slightly suspicious) by selecting one of the options provided.
- No identifying information will be collected or used in this survey. Your confidentiality will be maintained to the degree permitted by Survey Monkey. Specifically, no guarantees can be made regarding the interception of data sent via the Internet by any third parties.

If you have questions or concerns, you should contact Ravindra Gopaul at 717-531-0003, ext 320531. If you have questions regarding your rights as a research subject or concerns regarding your privacy, you may contact the research protection advocate in the Hershey Medical Center Human Subjects Protection Office at 717-531-5687.

Taking part in the research study is voluntary.

Your completion of the questionnaire implies your voluntary consent to participate in the research.

Please select 'Next' to continue.

Please complete the survey below.

1. Age

2. Gender

- Male  
 Female

3. Specialty

- Cardiology  
 Emergency Medicine

4. Do you work in an Academic or Community setting?

- Academic  
 Community

5. Number of years in clinical practice (after residency or fellowship). Please enter a whole number. If still in residency or fellowship, please enter 0.

6. Are you an Attending, Resident, Fellow or Advanced Practice Provider?

- Attending  
 Resident  
 Fellow  
 Advanced Practice Provider

7. If a Resident or Fellow, please indicate your current year of residency or fellowship (i.e. 1, 2 or 3). If not a resident or fellow, please enter 0.

8. In what State do you practice clinically?

9. Do you use the HEART Score Tool in your clinical practice?

- Yes  
 No

10. Is the HEART Score a useful tool to risk stratify patients with chest pain?

- Yes  
 No

11. Which component of the HEART Score Tool do you find most subjective?

- History  Risk Factors  
 ECG Assessment  Troponin  
 Age

**Below is a series of clinical vignettes. For each, please assign a score for clinical history as you would using the HEART Score Tool.**

12. 45 year old man with no significant medical history presents with chest pain. It has been occurring intermittently over the last several weeks. It occurred several times on exertion but he noticed it at other times when he wasn't doing anything. It feels like a heaviness in the center of his chest and lasts for several minutes. It gets better if he relaxes and takes deep breaths. It is associated with shortness of breath but not diaphoresis or nausea. It does not radiate. He has been under a lot of stress in the last several weeks due to family-related issues.

In determining the HEART score, how many points would you assign in this case to the clinical history?

- Highly suspicious (2 points)  
 Moderately suspicious (1 point)  
 Slightly suspicious (0 points)

13. 65 year old man with unknown history presents with chest pain. Pain is substernal. Pain was initially exertional for the past week, but became constant this morning. Pain radiates down the left arm and is associated with nausea and diaphoresis. Pain is not pleuritic or reproducible.

In determining the HEART score, how many points would you assign in this case to the clinical history?

- Highly suspicious (2 points)  
 Moderately suspicious (1 point)  
 Slightly suspicious (0 points)

14.

A 50.0% 55 year old woman with history of high blood pressure controlled on a single agent presents with chest pain that has been occurring while working out at the gym over the last week when she uses the elliptical machine. It occurs in her right upper chest and is described as sharp. She rates it as an 8 out of 10. It lasts for 5 to 10 minutes and goes away after she stops exercising. It is not associated with shortness of breath or diaphoresis and it does not radiate. She has never experienced pain like this before. She has never smoked cigarettes and none of her immediate family members have heart disease.

In determining the HEART score, how many points would you assign in this case to the clinical history?

B 50.0% 55 year old woman with history of CAD s/p 2 PCI procedures over the last 5 years with stents in her LAD and Circumflex who also has hypertension, high cholesterol and type 2 diabetes presents with chest pain that has been occurring while working out at the gym over the last week when she uses the elliptical machine. It occurs in her right upper chest and is described as sharp. She rates it as an 8 out of 10. It lasts for 5 to 10 minutes and goes away after she stops exercising. It is not associated with shortness of breath or diaphoresis and it does not radiate. She has never experienced pain like this before. She has a 30 pack-year history of cigarette smoking and her brother had a CABG in his early 40's.

In determining the HEART score, how many points would you assign in this case to the clinical history?

- Highly suspicious (2 points)
- Moderately suspicious (1 point)
- Slightly suspicious (0 points)

15.

A 50.0%

60 year old woman with no significant past medical history presents with chest pain. Pain is left-sided and sharp. It does not radiate and is not reproducible. Pain occurred at rest and lasted about 10 minutes. Pain is not pleuritic. She reports a similar pain that has now returned in the emergency department. Patient reports a similar pain over the past year, but paid it no attention.

In determining the HEART score, how many points would you assign in this case to the clinical history?

B 50.0%

60 year old man with no significant past medical history presents with chest pain. Pain is left-sided and sharp. It does not radiate and is not reproducible. Pain occurred at rest and lasted about 10 minutes. Pain is not pleuritic. He reports a similar pain that has now returned in the emergency department. Patient reports a similar pain over the past year, but paid it no attention.

In determining the HEART score, how many points would you assign in this case to the clinical history?

- Highly suspicious (2 points)
- Moderately suspicious (1 point)
- Slightly suspicious (0 points)

16.

A 50.0%

68 year old man with history of hypertension presents with chest pain. Pain stated 30 minutes ago while at rest. Patient had been lifting weights earlier in the day, but does not recall any injury. Patient appears in significant distress with his right arm clutched across the left chest. He describes the pain as sharp and 10 out of 10. He denies nausea or shortness of breath. Pain does not radiate.

In determining the HEART score, how many points would you assign in this case to the clinical history?

B 50.0%

68 year old man with history of hypertension presents with chest pain. Pain stated 30 minutes ago while at rest. Patient had been lifting weights earlier in the day, but does not recall any injury. Patient appears in mild distress. He describes the pain as sharp and 10 out of 10. He denies nausea or shortness of breath. Pain does not radiate.

In determining the HEART score, how many points would you assign in this case to the clinical history?

- Highly suspicious (2 points)
- Moderately suspicious (1 point)
- Slightly suspicious (0 points)

17.

A 50.0%

52 year old male with history of hypertension and diabetes presents with chest pain. Pain started this morning while walking the dog. Was substernal and described as a dull ache that radiated down his left arm. Pain improved after about 10 minutes on the couch. Patient reported associated nausea, which has since improved. Patient reports a similar pain 1 year prior and had a negative stress test.

In determining the HEART score, how many points would you assign in this case to the clinical history?

B 50.0%

52 year old male with history of hypertension and diabetes presents with chest pain. Pain started this morning while walking the dog. Was substernal and described as a dull ache that radiated down his left arm. Pain improved after about 10 minutes on the couch. Patient reported associated nausea, which has since improved. Patient reports a similar pain 1 year prior which was not worked up.

In determining the HEART score, how many points would you assign in this case to the clinical history?

- Highly suspicious (2 points)
- Moderately suspicious (1 point)
- Slightly suspicious (0 points)

18.

A 50.0%

70 year old man with no significant past medical history presents with chest pain. Pain is right sided and came on suddenly while lying in bed this morning. Pain is sharp and does not radiate. Pain is not pleuritic. He has no associated nausea and does not appear diaphoretic. Patient reports no prior history of chest pain. He does not smoke and denies illicit drug use. Patient reports that his maternal grandmother had a "heart issue," but does not recall what it was.

In determining the HEART score, how many points would you assign in this case to the clinical history?

B 50.0%

30 year old man with no significant past medical history presents with chest pain. Pain is right sided and came on suddenly while lying in bed this morning. Pain is sharp and does not radiate. Pain is not pleuritic. He has no associated nausea and does not appear diaphoretic. Patient reports no prior history of chest pain. He does not smoke and denies illicit drug use. Patient reports that his maternal grandmother had a "heart issue," but does not recall what it was.

In determining the HEART score, how many points would you assign in this case to the clinical history?

- Highly suspicious (2 points)
- Moderately suspicious (1 point)
- Slightly suspicious (0 points)

19.

A 50.0% A 40 year old male with a past medical history of asthma presents to the ED for chest pain. He states the chest pain began about an hour and a half ago while he was walking back to his homeless shelter. He described it as a sharp, left sided pain. He reports some discomfort with deep breaths. The pain was relieved slightly with rest, but is still ongoing. He was given tums by a friend but his symptoms continued to worsen and he broke out in a sweat and started to feel short of breath. The patient does not own a phone and asked the homeless shelter to call 911. The patient has not seen a doctor in over 5 years.

B 50.0% A 40 year old male with a past medical history of asthma presents to the ED for chest pain. He states the chest pain began about an hour and a half ago while he was walking down the organic food aisle at the grocery store. He described it as a sharp, left sided pain. He reports some discomfort with deep breaths. The pain was relieved slightly with rest, but is still ongoing. He went home and took tums but his symptoms continued to worsen and he broke out in a sweat and started to feel short of breath. At that time, the patient's wife called his PCP who directed them to the ED and even called ahead to give report. The CMO of the hospital is at bedside as this patient is a major donor to the hospital.

- Highly suspicious (2 points)
- Moderately suspicious (1 point)
- Slightly suspicious (0 points)

20.

A 50.0% A 68 year old Caucasian female presents to the ED for chest pain. She describes it as a 3/10 sharp pain and it is not associated with shortness of breath. The pain is located in the midsternal and epigastric area and does not radiate. The pain has been constant since it started 5 hours ago while she was watching TV. She does state that she spent the morning caring for her bedridden mother which is somewhat physically and emotionally stressful. No history of similar symptoms in the past. She took an aspirin because she saw it on an episode of House once.

B 50.0% A 68 year old African American female presents to the ED for chest pain. She describes it as a 3/10 sharp pain and it is not associated with shortness of breath. The pain is located in the midsternal and epigastric area and does not radiate. The pain has been constant since it started 5 hours ago while she was watching TV. She does state that she spent the morning caring for her bedridden mother which is somewhat physically and emotionally stressful. No history of similar symptoms in the past. She took an aspirin because she saw it on an episode of House once.

- Highly suspicious (2 points)
- Moderately suspicious (1 point)
- Slightly suspicious (0 points)

21. Please enter your email address if you would like to be included in the drawing for the \$100 Amazon Gift Card. Email addresses will only be used for the drawing and will be deleted from the database.

**Email Address**
